# Supplementary material for: Biogenic Synthesis of Metal Nanoparticles Using a Biosurfactant Extracted from Corn and Their Antimicrobial Properties
Source: PubMed Central journal article supplement (PMC5485786; doi:10.3390/nano7060139), 2017-06-06
Supplement: nanomaterials-07-00139-s001.pdf [file nanomaterials-07-00139-s001.pdf]

## **Supporting information**

**for**

# **Biogenic Synthesis of Metal Nanoparticles Using a Biosurfactant Extracted from Corn and Their Antimicrobial Properties**

Sergio Gómez-Graña,<sup>1,\*</sup> María Perez-Ameneiro,<sup>2</sup> Xanel Vecino,<sup>2,3</sup> Isabel Pastoriza-Santos,<sup>1</sup> Jorge Perez-Juste,<sup>1</sup> Jose Manuel Cruz,<sup>2</sup> Ana Belén Moldes<sup>2</sup>

<sup>1</sup>Departamento de Química Física y CINBIO, Universidade de Vigo. 36310, Vigo, Spain.

<sup>2</sup>Chemical Engineering Department, School of Industrial Engineering (EEI), University of Vigo. Campus As Lagoas-Marcosende. 36310 Vigo-Pontevedra, Spain.

<sup>3</sup>CEB-Centre of Biological Engineering, University of Minho, Campus de Gualtar. 4710-057 Braga, Portugal.

\* corresponding author: [segomez@uvigo.es](mailto:segomez@uvigo.es)

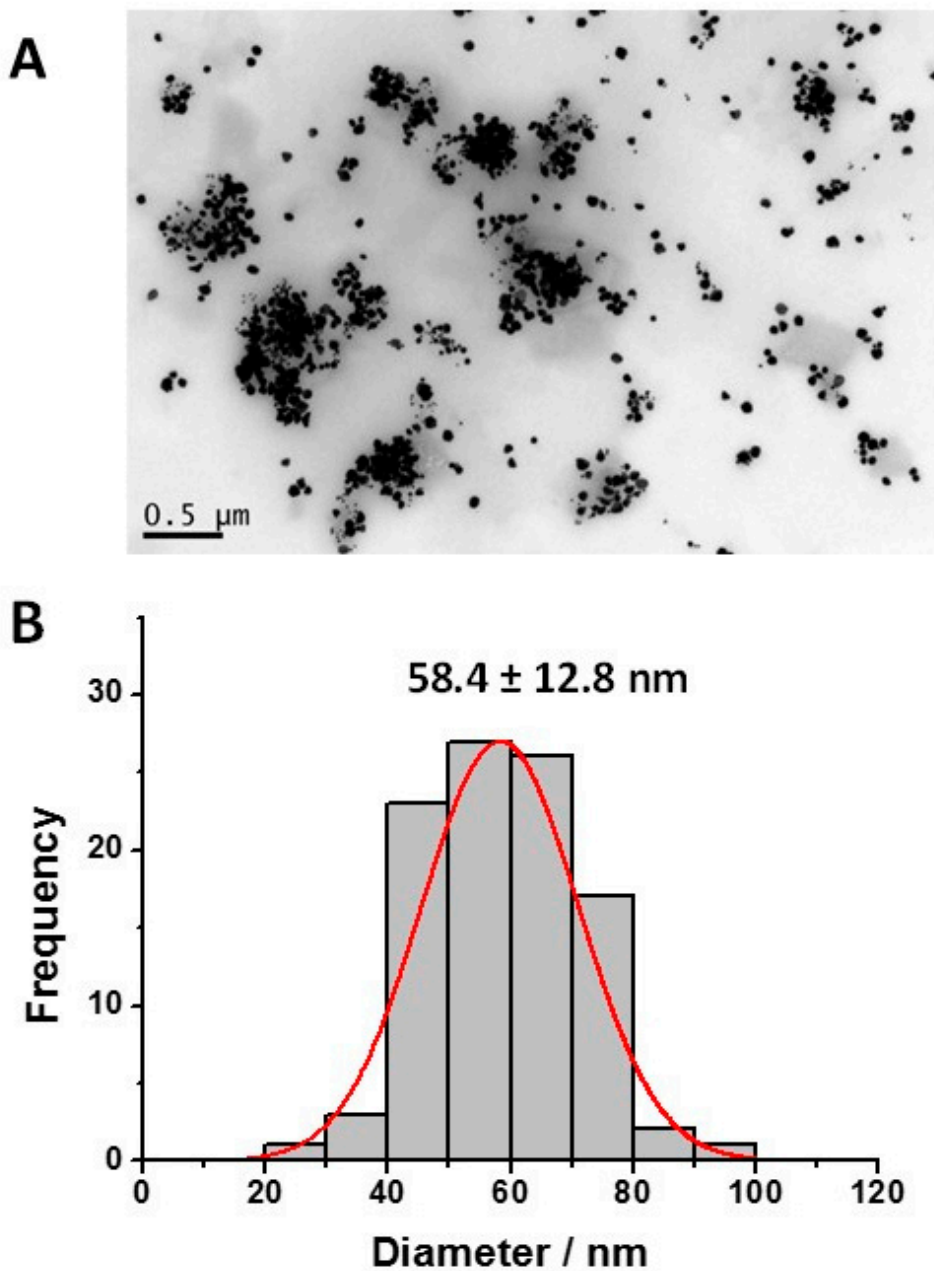

**Figure S1.** (A) Representative TEM image of Au NPs synthesized in the presence of biosurfactant extracted from CSL and its corresponding size distribution histograms for the spherical Au NPs synthesized at 40°C (B).

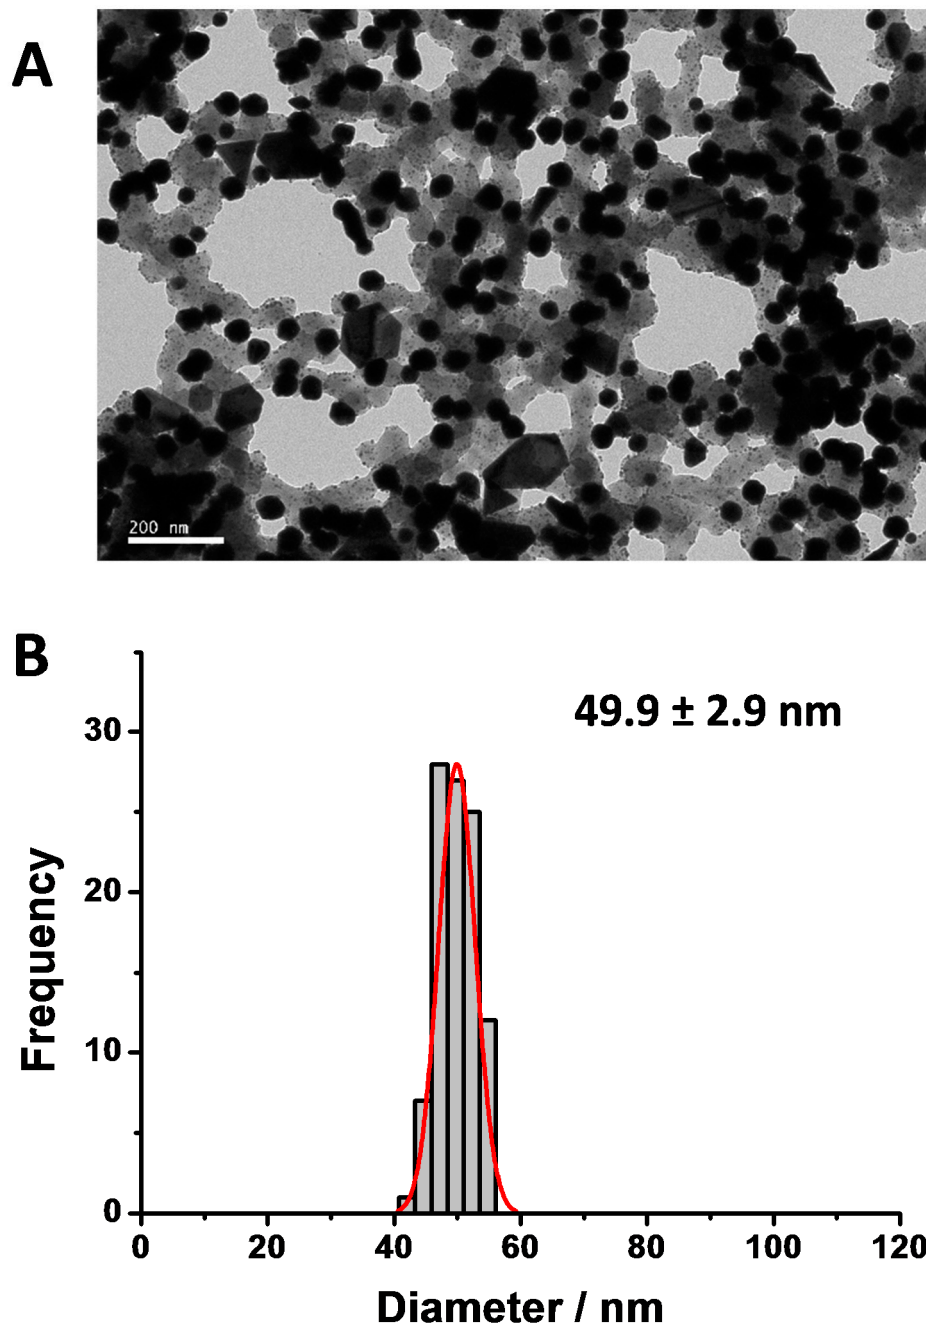

**Figure S2.** (A) Representative TEM image of Au NPs synthesized in the presence of biosurfactant extracted from CSL and its corresponding size distribution histograms for the spherical Au NPs synthesized at 50°C (B).

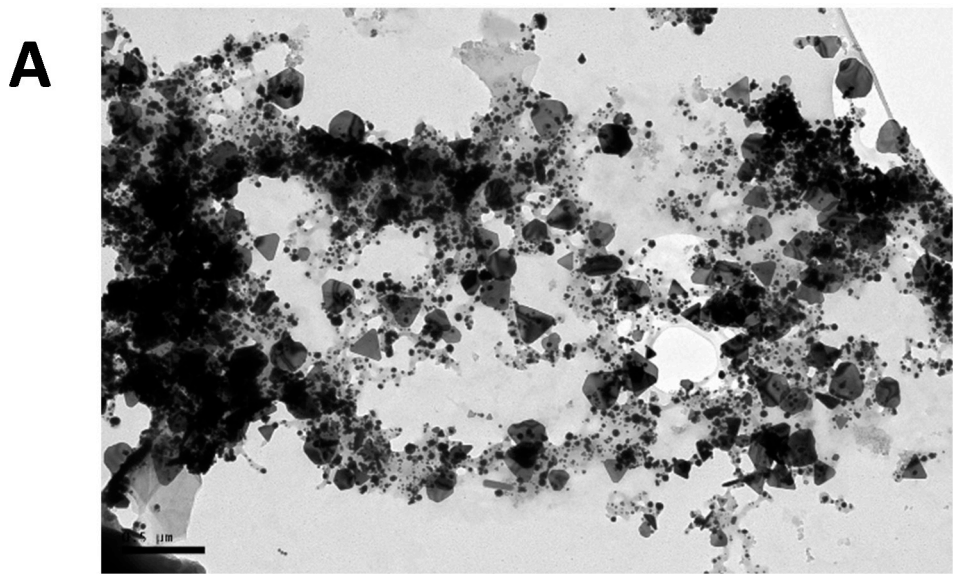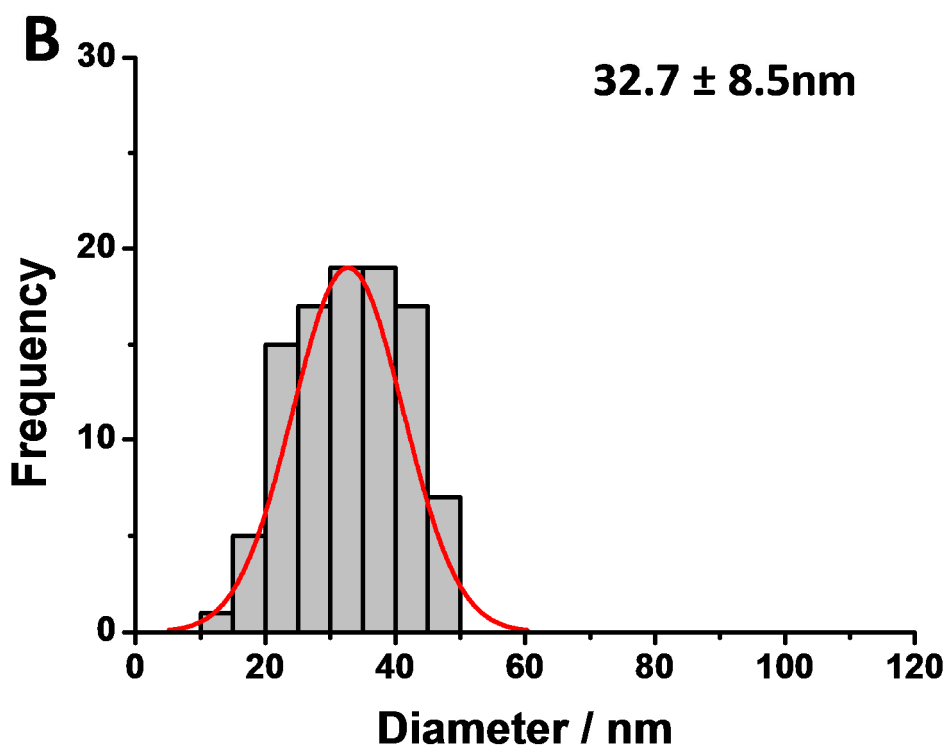

**Figure S3.** (A) Representative TEM image of Au NPs synthesized in the presence of biosurfactant extracted from CSL and its corresponding size distribution histograms for the spherical Au NPs synthesized at 60°C (B).

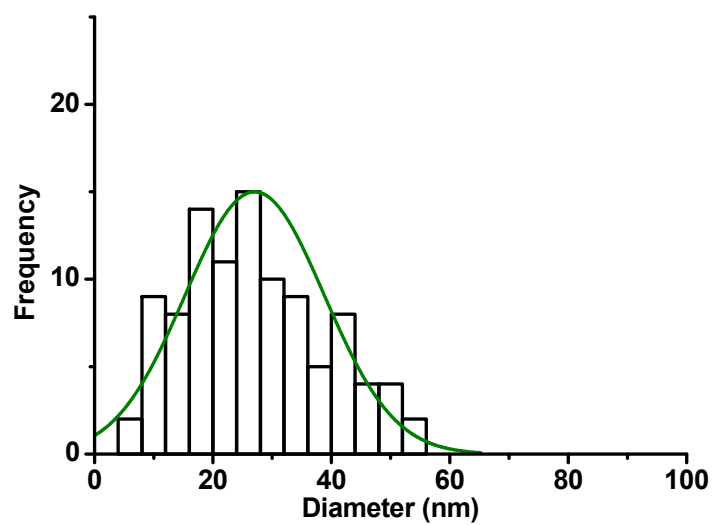

**Figure S4.** Size distribution histogram for the Ag NPs synthesized in the presence of the biosurfatant.

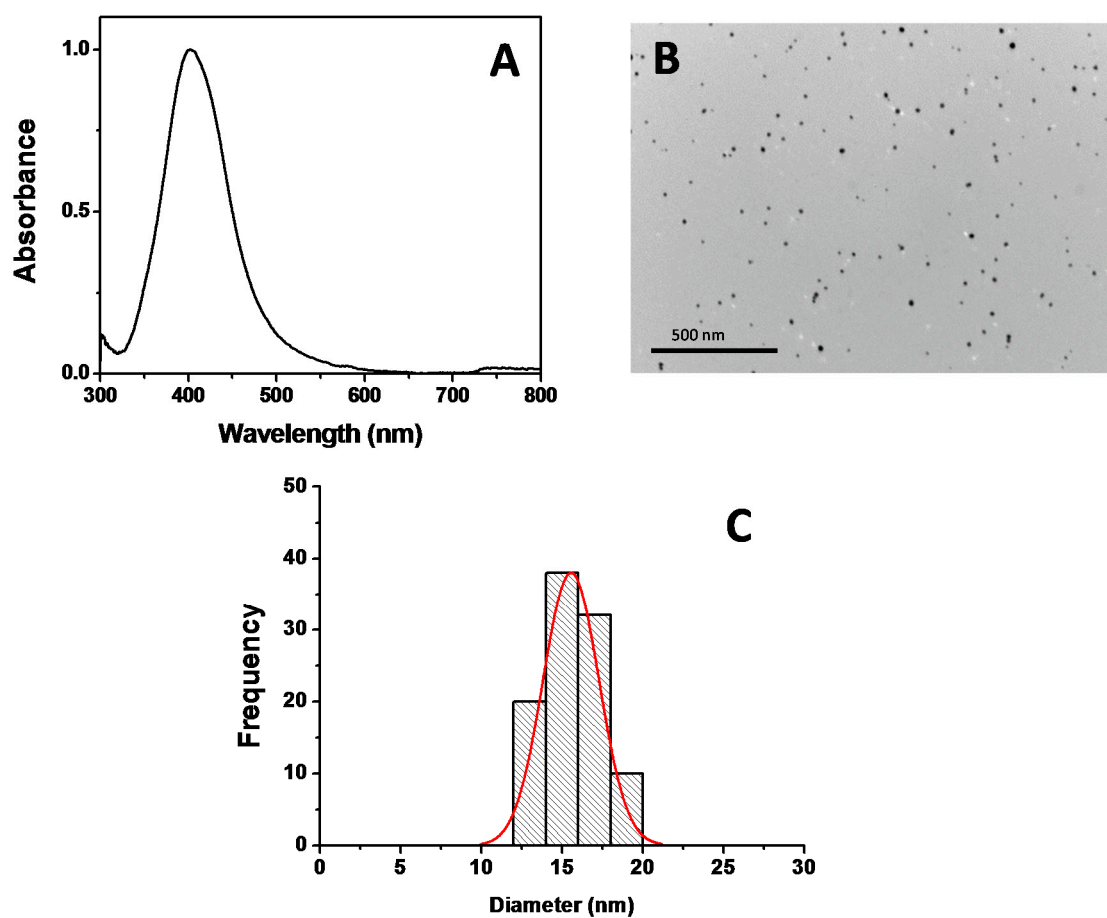

**Figure S5.** (A) UV-Vis spectrum of a dispersion of citrate stabilized Ag NPs. (B) Representative TEM image of Ag@NPs synthesized in the presence of sodium citrate and their corresponding size distribution histograms (C).
